# Supplementary material for: ALDB: A Domestic-Animal Long Noncoding RNA Database
Source: PubMed Central journal article supplement (PMC4390226; doi:10.1371/journal.pone.0124003), 2015-04-08
Supplement: pone.0124003.s001.pdf [file pone.0124003.s001.pdf]

## Additional file 1: Datasets used in identification of domestic-animal lncRNAs

**Table A - Data used in previous domestic-animal lncRNA research**

| Organism | Tissue | Number of Samples | Data    | Description                                 | Reference |
|----------|--------|-------------------|---------|---------------------------------------------|-----------|
| Pig      | gonad  | 2                 | RNA-seq | 2,047 lincRNAs; unpublished                 | [1]       |
| Chicken  | skm    | 1                 | RNA-seq | 281 lincRNAs; genomic structure unpublished | [2]       |
| Bovine   | skin   | 2                 | RNA-seq | 4,365 lincRNAs; unpublished                 | [3]       |
| Bovine   | -      | -                 | EST     | 23,060 ncRNAs;                              | [4]       |
| Bovine   | -      | -                 | EST     | 449 lincRNAs;                               | [5]       |

**Table B - Summary statistics for all RNA-seq data used in this study**

| Organism | Number of Samples | Number of Tissues | Tissue                                                                                                                                                                                                                        |
|----------|-------------------|-------------------|-------------------------------------------------------------------------------------------------------------------------------------------------------------------------------------------------------------------------------|
| Pig      | 93                | 19                | Frontal cortex, occipital cortex, heart, spleen, cerebellum, hypothalamus, lung, liver, longissimus dorsi, kidney, abdominal fat, endometrium, sperm cell, colon, small intestine, lymph node, frontal lobe, placenta, testis |
| Chicken  | 36                | 10                | Testes, spleen, skm, lung, liver, kidney, heart, colon, brain, ovary                                                                                                                                                          |
| Cow      | 27                | 9                 | Testes, spleen, skm, lung, liver, kidney, heart, colon, brain                                                                                                                                                                 |

**Table C - RNA-seq data used in this study**

| Raw Data  | Number of Samples | Tissue                                                                                                            | Reference |
|-----------|-------------------|-------------------------------------------------------------------------------------------------------------------|-----------|
| ERA178851 | 20                | Frontal cortex, occipital cortex, heart, spleen, cerebellum, hypothalamus, lung, liver, longissimus dorsi, kidney | [6]       |
| ERA209456 | 10                | Brain frontal cortex                                                                                              | [7]       |
| SRA109352 | 10                | Hypothalamus                                                                                                      | [8]       |
| SRA065859 | 4                 | Heart, liver, lung, kidney                                                                                        | [9]       |
| SRA031272 | 6                 | Longissimus dorsi muscle, abdominal fat, liver                                                                    | [10]      |
| SRA065370 | 8                 | Endometrium                                                                                                       | [11]      |
| SRA092777 | 4                 | Sperm cell                                                                                                        | [12]      |
| SRA093372 | 8                 | Endometrium                                                                                                       | [13]      |

|           |    |                                                                                                                                                              |      |
|-----------|----|--------------------------------------------------------------------------------------------------------------------------------------------------------------|------|
| SRA057367 | 3  | Pool of 11 pig tissues (colon, kidney, hypothalamus, spleen, small intestine, lymph node, liver, lung, frontal lobe, cerebellum, placenta), placenta, testis | [14] |
| SRA066357 | 20 | Liver, testis                                                                                                                                                | [15] |
| SRA064905 | 4  | Ovary, testis, brain                                                                                                                                         | [16] |
| SRA059960 | 53 | Testes, spleen, skm, lung, liver, kidney, heart, colon, brain                                                                                                | [17] |
| SRA059267 | 5  | Brain, liver, kidney, heart, skeletal muscle                                                                                                                 | [18] |

**Table D - UniGene datasets used in this study**

| Organism                | Build      | #UniGene Entries | Release Date |
|-------------------------|------------|------------------|--------------|
| Sus scrofa (pig)        | build #42  | 50106            | Jul 9 2012   |
| Gallus gallus (chicken) | build #46  | 33850            | Sep 26 2012  |
| Bos taurus (cow)        | build #101 | 45364            | Jul 9, 2012  |

## References

1. Esteve-Codina A, Kofler R, Palmieri N, Bussotti G, Notredame C, Perez-Enciso M. Exploring the gonad transcriptome of two extreme male pigs with RNA-seq. *BMC genomics* 2011;12: 552.
2. Li T, Wang S, Wu R, Zhou X, Zhu D, Zhang Y. Identification of long non-protein coding RNAs in chicken skeletal muscle using next generation sequencing. *Genomics* 2012;99: 292-298.
3. Weikard R, Hadlich F, Kuehn C. Identification of novel transcripts and noncoding RNAs in bovine skin by deep next generation sequencing. *BMC Genomics* 2013;14: 789.
4. Qu Z, Adelson DL. Bovine ncRNAs are abundant, primarily intergenic, conserved and associated with regulatory genes. *PLoS One* 2012;7: e42638.
5. Huang W, Long N, Khatib H. Genome-wide identification and initial characterization of bovine long non-coding RNAs from EST data. *Anim Genet* 2012;43: 674-682.
6. Farajzadeh L, Hornshøj H, Momeni J, Thomsen B, Larsen K, Hedegaard J, et al. Pairwise comparisons of ten porcine tissues identify differential transcriptional regulation at the gene, isoform, promoter and transcription start site level. *Biochem Biophys Res Commun* 2013;438: 346-352.
7. Albert FW, Somel M, Carneiro M, Aximu-Petri A, Halbwax M, Thalmann O, et al. A comparison of brain gene expression levels in domesticated and wild animals. *PLoS genetics* 2012;8: e1002962.
8. Pérez-Montarelo D, Madsen O, Alves E, Rodríguez MC, Folch JM, Noguera JL, et al. Identification of genes regulating growth and fatness traits in pig through hypothalamic transcriptome analysis. *Physiol Genomics* 2013.
9. Li M, Tian S, Jin L, Zhou G, Li Y, Zhang Y, et al. Genomic analyses identify distinct patterns of selection in domesticated pigs and Tibetan wild boars. *Nat Genet* 2013;45: 1431-1438.
10. Chen C, Ai H, Ren J, Li W, Li P, Qiao R, et al. A global view of porcine transcriptome in three tissues from a full-sib pair with extreme phenotypes in growth and fat deposition by paired-end RNA sequencing. *BMC Genomics* 2011;12: 448.
11. Samborski A, Graf A, Krebs S, Kessler B, Bauersachs S. Deep Sequencing of the Porcine Endometrial Transcriptome on Day 14 of Pregnancy 1. *Biol Reprod* 2013;88.
12. Bruggmann R, Jagannathan V, Braunschweig M. In Search of Epigenetic Marks in Testes and Sperm Cells of Differentially Fed Boars. *PLoS One* 2013;8: e78691.
13. Samborski A, Graf A, Krebs S, Kessler B, Reichenbach M, Reichenbach H-D, et al. Transcriptome Changes in the Porcine Endometrium During the Pre-attachment Phase. *Biol Reprod* 2013;

biolreprod. 113.112177.

14. Groenen MA, Archibald AL, Uenishi H, Tuggle CK, Takeuchi Y, Rothschild MF, et al. Analyses of pig genomes provide insight into porcine demography and evolution. *Nature* 2012;491: 393-398.
15. Gunawan A, Sahadevan S, Neuhoff C, Große-Brinkhaus C, Gad A, Frieden L, et al. RNA Deep Sequencing Reveals Novel Candidate Genes and Polymorphisms in Boar Testis and Liver Tissues with Divergent Androstenone Levels. *PLoS One* 2013;8: e63259.
16. Brawand D, Soumillon M, Necsulea A, Julien P, Csárdi G, Harrigan P, et al. The evolution of gene expression levels in mammalian organs. *Nature* 2011;478: 343-348.
17. Merkin J, Russell C, Chen P, Burge CB. Evolutionary dynamics of gene and isoform regulation in Mammalian tissues. *Science* 2012;338: 1593-1599.
18. Barbosa-Morais NL, Irimia M, Pan Q, Xiong HY, Gueroussov S, Lee LJ, et al. The evolutionary landscape of alternative splicing in vertebrate species. *Science* 2012;338: 1587-1593.
