# Supplementary material for: ALDB: A Domestic-Animal Long Noncoding RNA Database
Source: PubMed Central journal article supplement (PMC4390226; doi:10.1371/journal.pone.0124003), 2015-04-08

## Additional file 2. Entity-Relation diagram of the ALDB database.

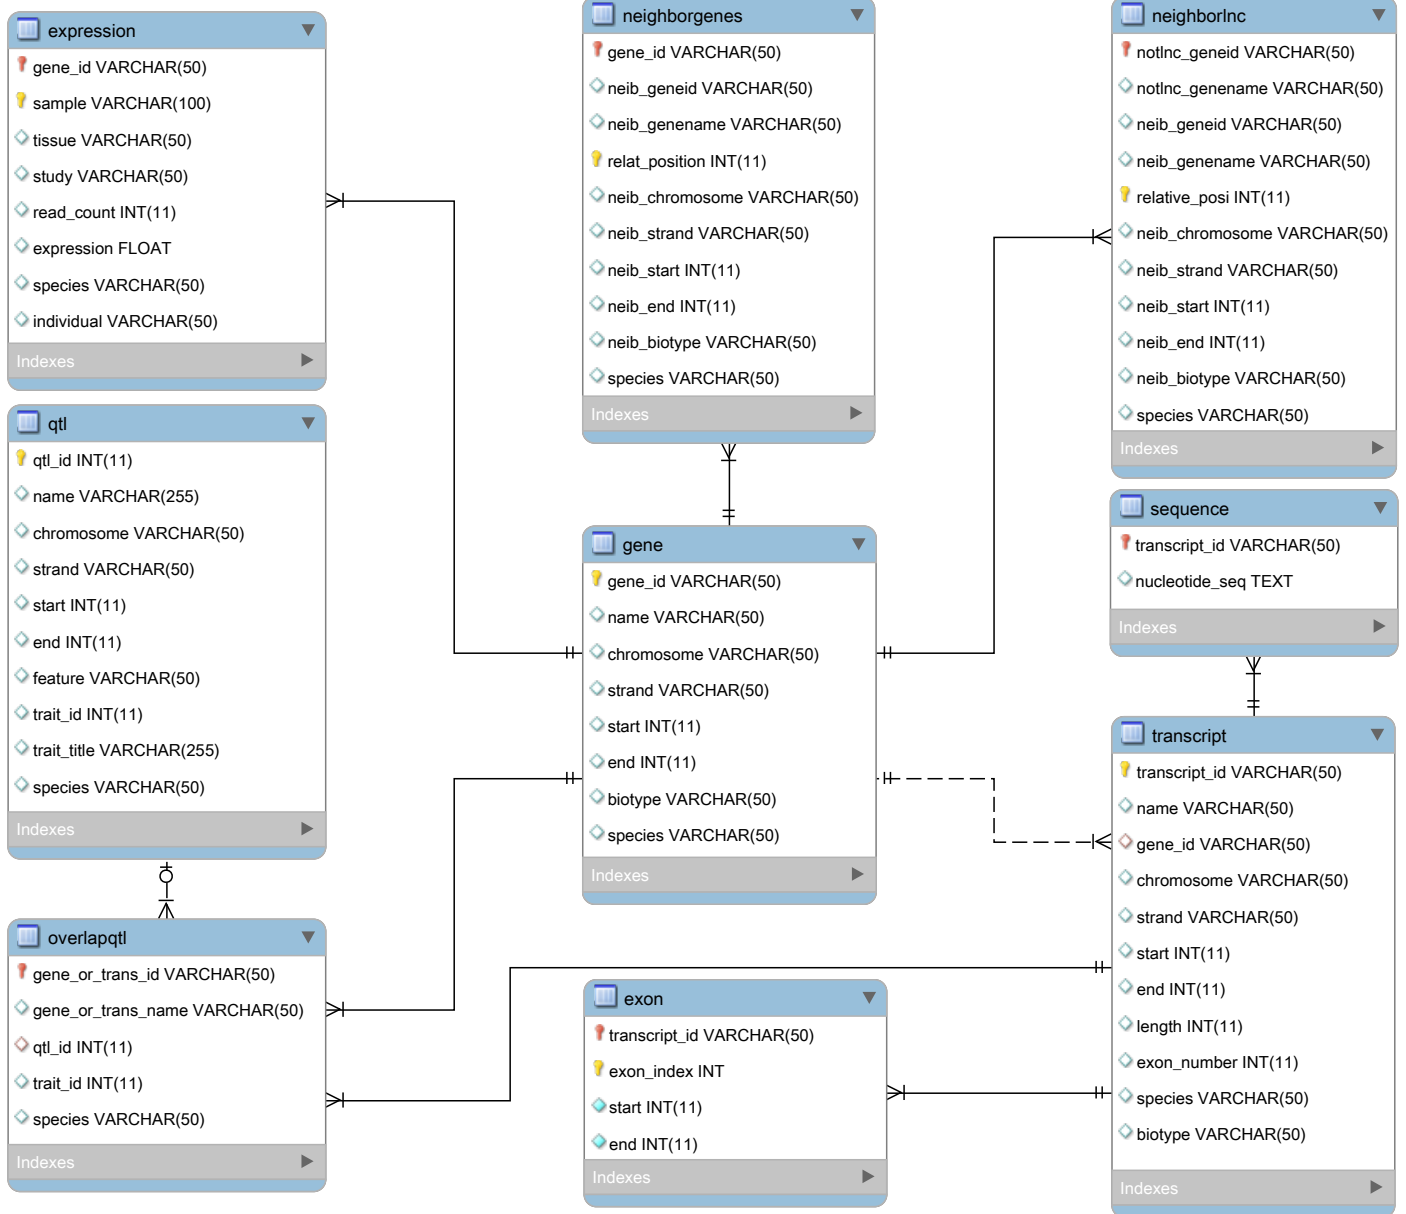

Supplement: pone.0124003.s002.pdf [file pone.0124003.s002.pdf]
